# Supplementary material for: Ultrasmall Cu2O nanocrystals: facile synthesis, controllable assembly and photocatalytic properties
Source: Royal Society of Chemistry journal article supplement (doi:10.1039/c5ra06141e), 2015-01-01
Supplement: c5ra06141e1.pdf [file c5ra06141e1.pdf]

## Ultrasmall Cu<sub>2</sub>O Nanocrystals: Facile Synthesis, Controllable

### Assembly and Photocatalytic Properties

Xiaoyou Yuan, Hai Yuan, Lina Ye, Junjie Hu, Ying Xu, Peng Li\*  
School of Chemistry and Chemical Engineering, Anhui University, Hefei 230601, P.  
R. China

\*Email: [peng-li@ahu.edu.cn](mailto:peng-li@ahu.edu.cn)

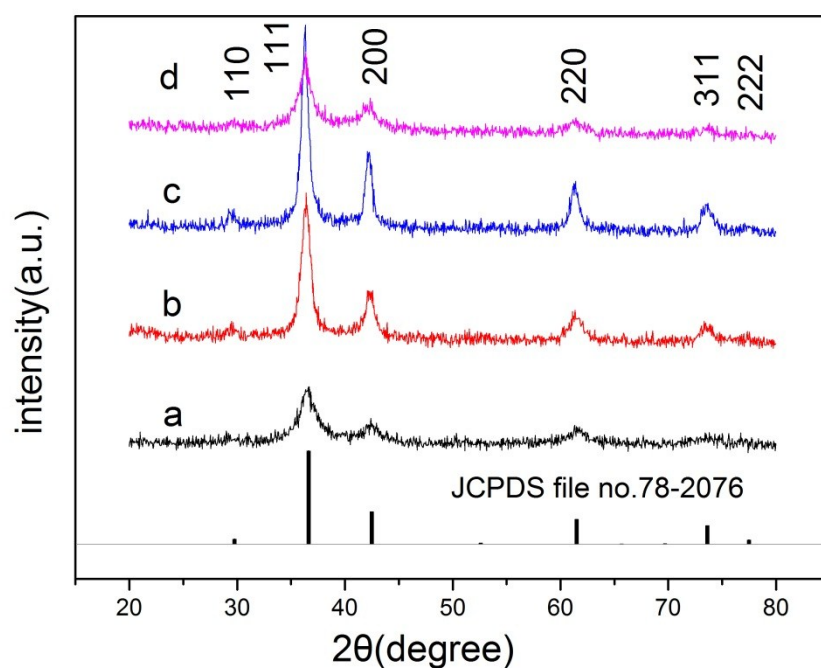

Figure S1 XRD patterns of Cu<sub>2</sub>O USNCs with different amount surfactants: (a) 0.2g PVP and 0.2ml OA; (b) 0.2g PVP and 2ml OA; (c) 0.5g PVP and 0.5ml OA; (d) 0.5g PVP and 2ml OA.

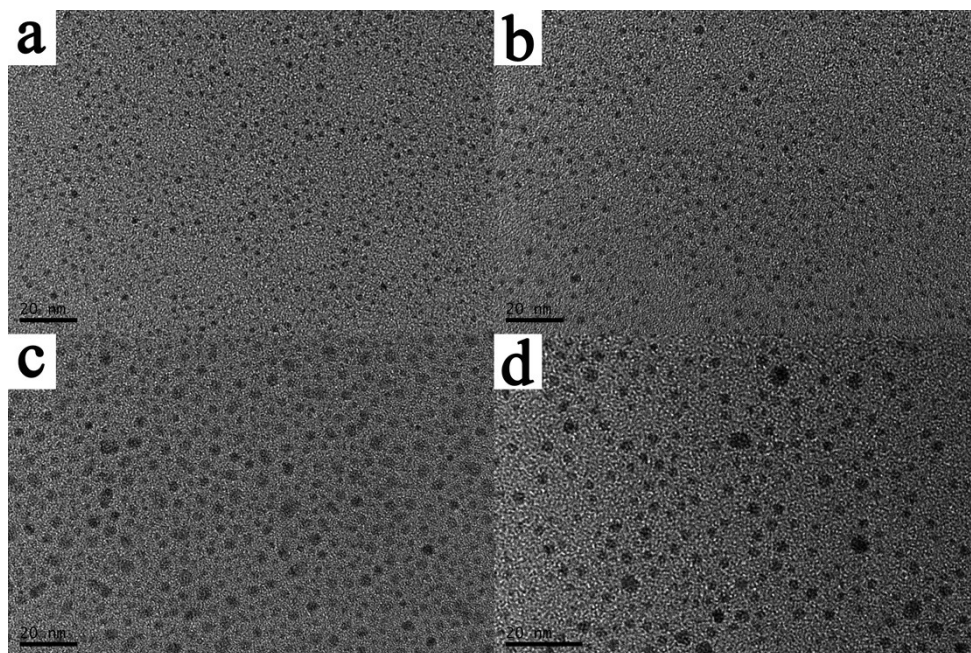

Figure S2. TEM images of  $\text{Cu}_2\text{O}$  USNCs: (a) 0.5g PVP and 0.5ml OA; (b) 0.5g PVP and 1ml OA; (c) 0.2g PVP and 0.2ml OA; (d) 0.2g PVP and 1ml OA.

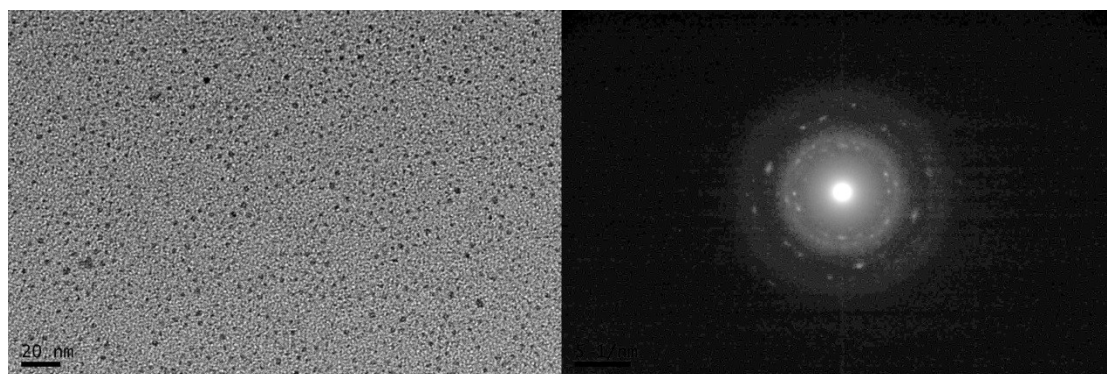

Figure S3. SAED images of the  $\text{Cu}_2\text{O}$  USNCs

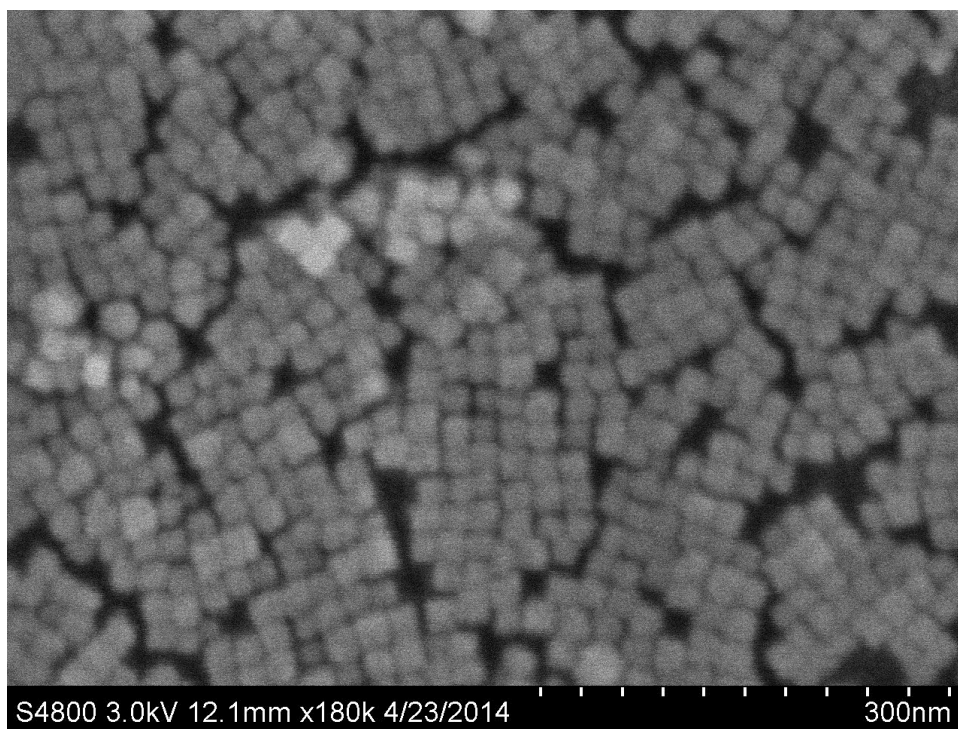

Figure S4 SEM image of the self-assembly Cu<sub>2</sub>O superlattices with 3ml DEC in cyclohexane

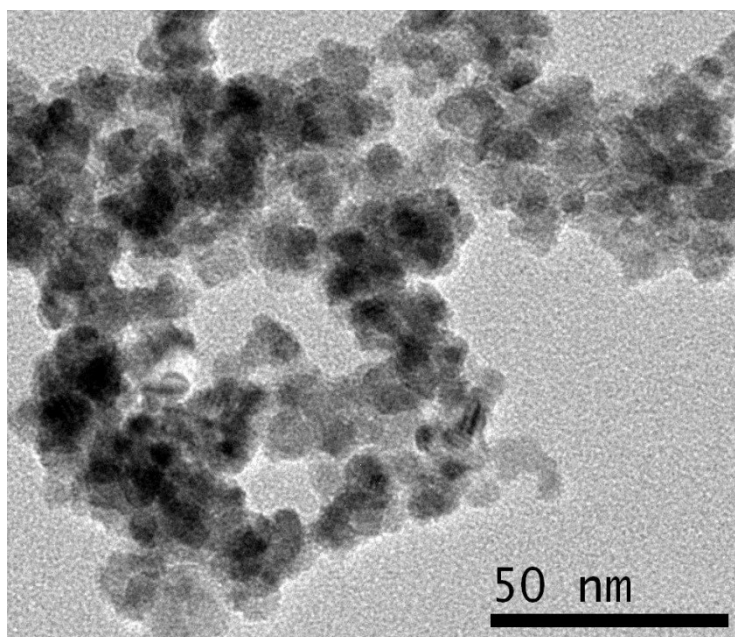

Figure S5 TEM image of the Cu<sub>2</sub>O nanoparticles.

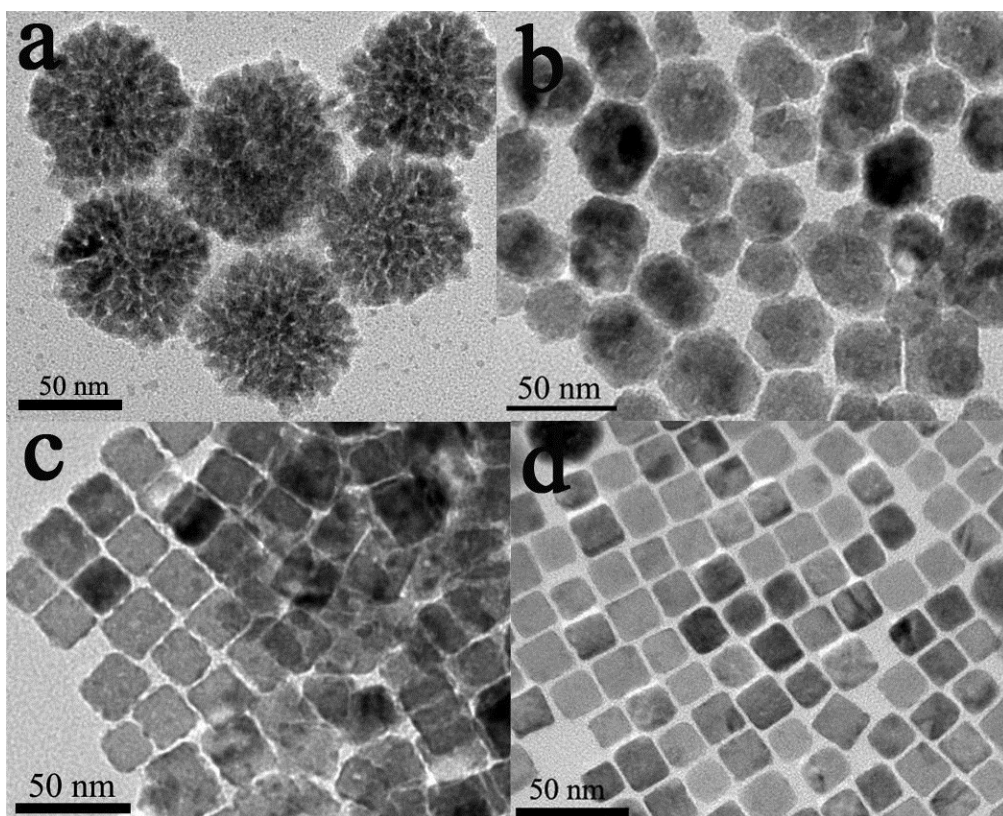

Figure S6 TEM images of the self-assembly of Cu<sub>2</sub>O nanoparticles in cyclohexane: (a) 0.5ml DEC; (b) 1.0ml DEC; (c) 1.5ml DEC and; (d) 3ml DEC.

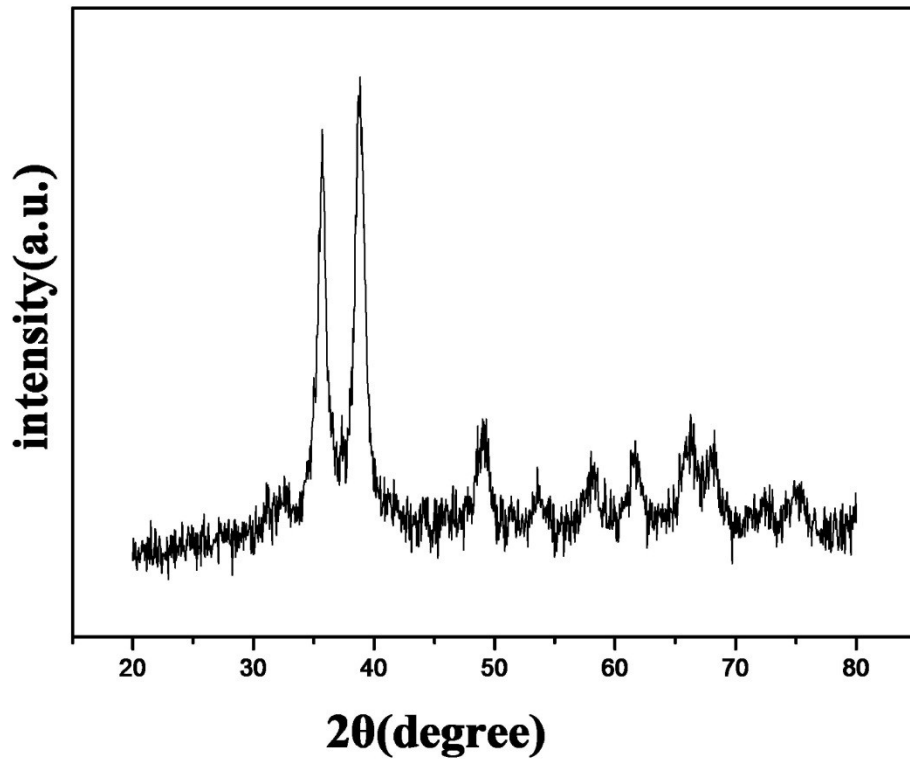

Figure S7 XRD pattern of CuO sample by directly evaporating in air in a beaker

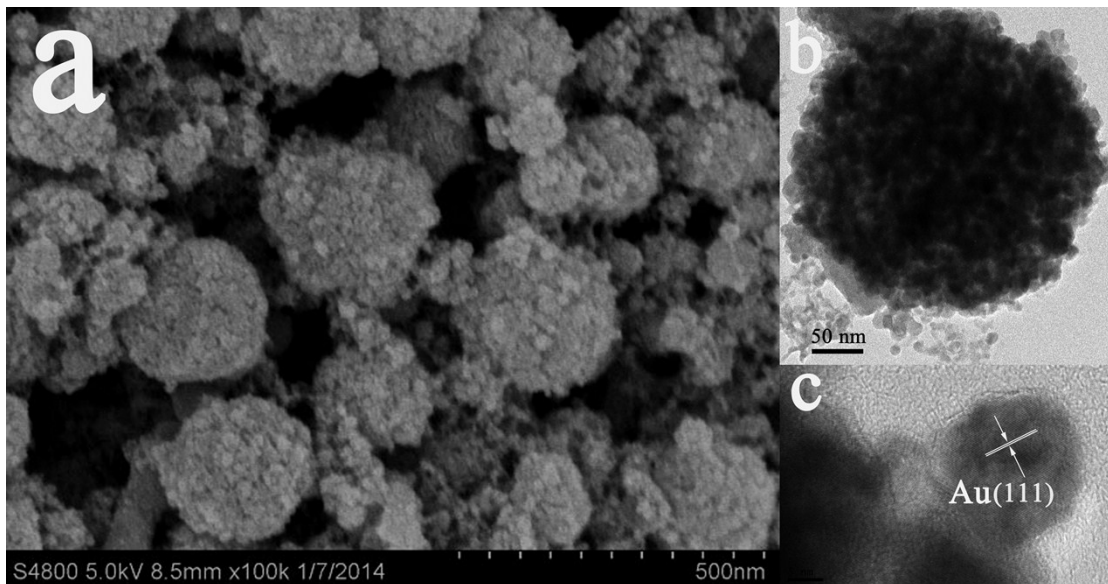

Figure S8 SEM and TEM image of the as-obtained  $\text{Cu}_2\text{O-Au}$  samples: (a) SEM image of the  $\text{Cu}_2\text{O-Au}$ ; (b) TEM image of the single  $\text{Cu}_2\text{O-Au}$  colloidal spheres; (c) HRTEM image of the Au nanoparticle

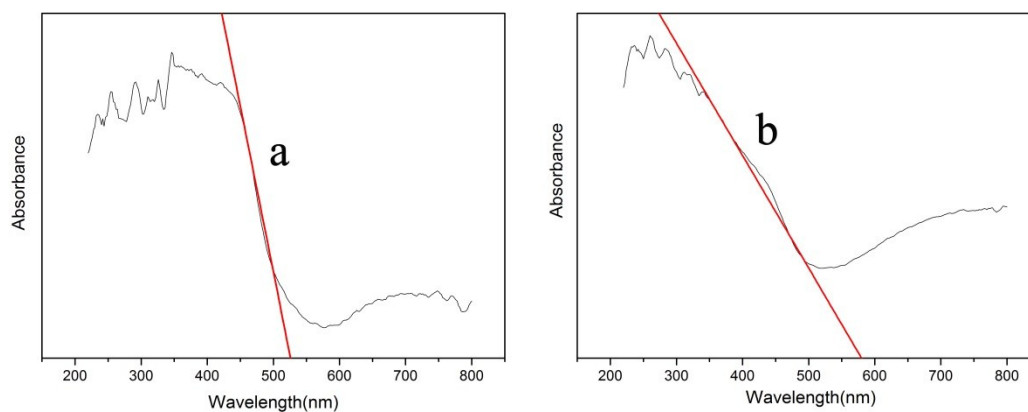

Figure S9 UV-vis diffuse reflectance spectra of Cu<sub>2</sub>O(a) and Cu<sub>2</sub>O-Au(2)(b)

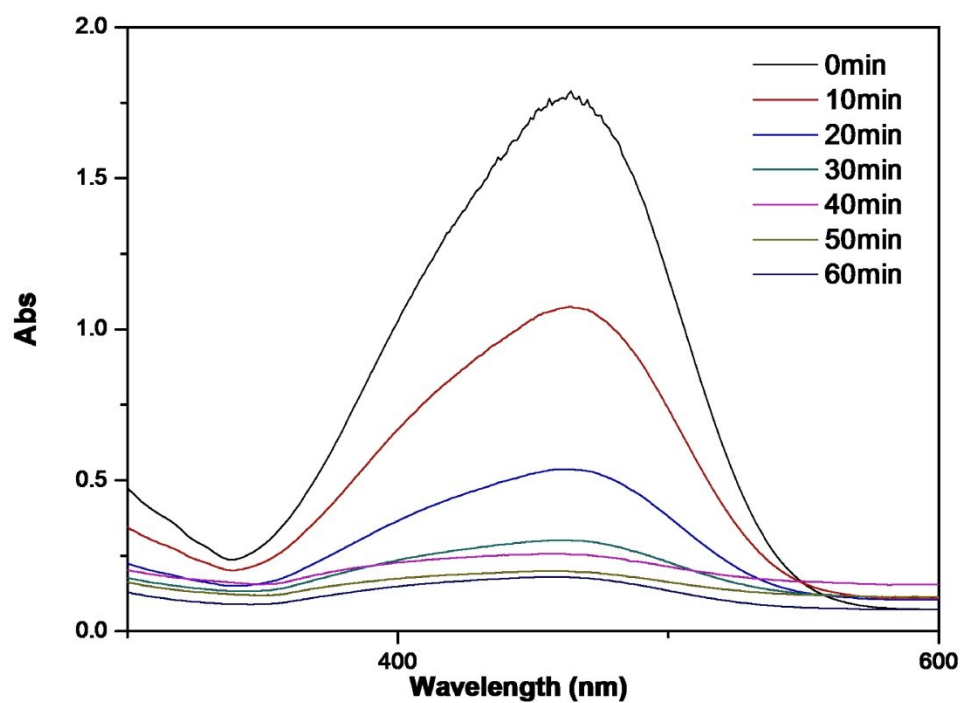

Figure S10 UV-vis absorption spectra of MO aqueous solution with the Cu<sub>2</sub>O-Au(2).
